1 **BROWN ADIPOSE TISSUE REMODELING PRECEDES CARDIOMETABOLIC**  
2 **ABNORMALITIES INDEPENDENT OF OVERWEIGHT IN FRUCTOSE-FEED MICE.**

3 Thaissa Queiroz Machado<sup>1\*</sup> (thaissatk@hotmail.com)

4 Debora Cristina Pereira-Silva<sup>1\*</sup> (deborasilvacp@gmail.com)

5 Leidyane Ferreira Gonçalves<sup>1</sup> (leidyannegoncalves@id.uff.br)

6 Caroline Fernandes-Santos<sup>1#</sup> (cf\_santos@id.uff.br)

7

8 <sup>1</sup>Laboratório Multiusuário de Pesquisa Biomédica, Departamento de Ciências Básicas,  
9 Universidade Federal Fluminense, Instituto de Saude de Nova Friburgo, Nova Friburgo, RJ, Brazil.

10 <http://www.punf.uff.br/lmpb/>

11 \*Both authors contributed equally to this work

12 #Corresponding Author: Rua Dr. Silvio Henrique Braune, 22, Centro, Nova Friburgo, RJ, Brazil,

13 28.625-650, Phone: +55 22 2528-7166, e-mail: cf\_santos@id.uff.br

14

15 Short title: BAT remodeling in fructose-fed normal-weight mice

16 **Abstract**

17 **Objectives:** To investigate the early cardiometabolic abnormalities along with WAT and BAT  
18 remodeling in short-term fructose feeding mice model. **Methods:** Mice (n=10-11/group) were fed  
19 for four weeks with control diet (AIN93-M) or experimental diets rich in glucose or fructose. We  
20 investigated body weight, body adiposity, blood glucose, lipid and hepatic parameters, and white  
21 (WAT) and brown adipose tissue (BAT) histopathology. **Results:** Fructose feeding promoted  
22 neither weight gain nor hypertrophy of visceral and subcutaneous WAT depots, but the fat was  
23 redistributed toward visceral depots. Glucose, lipid and hepatic metabolic dysfunction were not yet  
24 noticed in fructose-fed mice, with the exception for an elevation in total cholesterol and hepatic  
25 weight without steatosis. BAT mass did not increase, and it was proportionally reduced compared  
26 with visceral WAT in fructose feed mice. BAT suffered premature adverse morphological  
27 remodeling, characterized by increased lipid deposition per tissue area in enlarged intracellular lipid  
28 droplets. **Conclusion:** Short-term fructose feeding redistributes body fat, changes the proportion of  
29 BAT to visceral fat, and promotes BAT adverse remodeling, characterized by enlarged intracellular  
30 lipid droplets.

31 **Keywords:** Obesity; Adiposity; Visceral fat; Brown adipocyte

## 32 **Introduction**

33 Overfat is strongly associated with insulin resistance and chronic inflammation, as well as  
34 hypertension, dyslipidemia, cardiovascular diseases (for instance, coronary heart disease and  
35 stroke), cancer, type 2 diabetes, gallbladder disease, osteoarthritis, gout, and sleep apnea ("Obesity:  
36 Preventing and Managing the Global Epidemic. Report of a Who Consultation" 2000). However,  
37 excess body fat not always appears to be associated with cardiometabolic abnormalities. This  
38 statement came from observations that some subjects have normal weight but display excessive  
39 body fat percent and cardiometabolic dysfunction (metabolically obese normal weight, MONW),  
40 and there are also metabolically healthy but obese (MHO) subjects, that are overfat but have no  
41 signs of cardiometabolic dysfunction (Ruderman, et al. 1998). Regardless of body weight and body  
42 mass index, excessive body fat is associated with cardiometabolic dysfunction. The earliest signs of  
43 cardiometabolic dysfunction are excessive body fat, insulin resistance, and chronic low-grade  
44 systemic inflammation (Maffetone, Rivera-Dominguez, and Laursen 2017).

45 Individuals without obesity but with dyslipidemia and metabolic abnormalities have also been  
46 termed as normal weight dyslipidemia (NWD) (Ipsen, Tveden-Nyborg, and Lykkesfeldt 2016). This  
47 population has an increased risk of developing nonalcoholic fatty liver disease (NAFLD),  
48 cardiovascular disease and type 2 diabetes (Pagadala and McCullough 2012; Ruderman, et al.  
49 1998). As the liver regulates lipid metabolism and plasma lipid levels, it plays a significant role in  
50 turning an unhealthy diet and lifestyle into an unbalanced metabolic profile. The product of fasting  
51 triglycerides and glucose (TyG) is a useful index to assess both insulin resistance and hepatic  
52 steatosis/nonalcoholic steatohepatitis (NASH) in apparently normal subjects (Simental-Mendía, et  
53 al. 2016; Simental-Mendía, Rodríguez-Morán, and Guerrero-Romero 2008). Thus, it could be used  
54 as an additional early marker of metabolic dysfunction in MONW individuals.

55 The liver and the white adipose tissue (WAT) continuously exchange very low-density lipoproteins  
56 (VLDL) and free fatty acids (FFA) to store (WAT) and distribute (liver) energy. In obesity, the liver

57 modulates WAT inflammation and insulin sensitivity, and the hypertrophic WAT influences liver  
58 metabolism and inflammation (Scheja and Heeren 2016). Although WAT is a specialized lipid  
59 storage organ for excess calories, the brown adipose tissue (BAT) contains many mitochondria to  
60 dissipate chemical energy. It has been proven that BAT activity controls plasma clearance of  
61 circulating triglyceride rich lipoproteins (TRL) by increasing its uptake into BAT and thus  
62 promoting its turnover (Bartelt, et al. 2011).

63 So far, an animal model that mimics the MONW phenotype is missing. The Goto-Kakizaki rat is a  
64 non-obese Wistar substrain which develops type 2 diabetes early in life, characterized by mild  
65 hyperglycemia, insulin resistance, hyperinsulinemia and mild inflammation. It was proposed as a  
66 MONW model (Denis and Obin 2013), but it is not accessible to all researchers worldwide. A  
67 potential MONW model is fructose overfeeding in rodents. Purified diets containing fructose are  
68 capable of elevating TG and hepatic glucose production, ultimately leading to insulin resistance and  
69 hypertriglyceridemia (R. and A. 2017). The C57BL/6 mice feed with fructose for 8 weeks have no  
70 increase in body weight, but displays increased adiposity, glucose intolerance, and ectopic hepatic  
71 lipid accumulation as TG and diacylglycerol (Montgomery, et al. 2015).

72 Overall, the role of BAT on MONW phenotype was not investigated so far, and we hypothesize that  
73 BAT changes run together with cardiometabolic abnormalities independent of body weight gain.  
74 Thus, the aim of the present study was to investigate the early cardiometabolic changes along with  
75 WAT and BAT remodeling in C57BL/6 mice by short-term fructose feeding.

## 76 **Material and Methods**

### 77 *Experimental design*

78 The handling and experimental protocols were approved by the local Ethics Committee to Care and  
79 Use of Laboratory Animals (CEUA#647/15). The study was performed in accordance with the  
80 Animal Research Reporting in Vivo Experiments ARRIVE guidelines and the Guideline for the

81 Care and Use of Laboratory Animals (US NIH Publication N° 85-23. Revised 1996) (Kilkenny, et  
82 al. 2010). Male C57BL/6 mice at two months of age were obtained from colonies maintained at the  
83 Federal Fluminense University and kept under standard conditions (12 h light/dark cycles,  $21\pm 2^{\circ}\text{C}$ ,  
84 humidity  $60\pm 10\%$  and air exhaustion cycle 15 min/h).

85 At three months old, mice were randomly allocated into three groups according to the diet offered  
86 ( $n=10-11/\text{group}$ ). Control group received a purified diet according to AIN-93M standards (Reeves,  
87 Nielsen, and Fahey 1993), and the other two groups received isoenergetic modified AIN-93M diets  
88 rich in glucose or fructose (3.81 kcal/g), acquired from Pragsolucoes (Jau, Sao Paulo, Brazil). Both  
89 glucose and fructose diets were rich in simple carbohydrates since they have lower complex  
90 carbohydrate content (corn starch) and sucrose was removed (Table 1). Glucose rich diet was  
91 administered to evaluate if changes encountered by fructose feeding were due solely to single  
92 carbohydrate overfeeding or to the quality of the carbohydrate. Food and water were offered *ad*  
93 *libitum*. Food intake was measured daily and body mass weekly throughout 4 weeks. Energy  
94 efficiency was calculated as  $[(\Delta \text{ body weight} / \sum \text{ Kcal ingested}) \times 100]$ .

#### 95 *Glucose, lipid and hepatic parameters*

96 On the day of euthanasia, blood was obtained from awake 6-hour fasted mice by milking the tail  
97 after a little incision on its tip and plasma glucose was assessed using a glucometer (One Touch  
98 Ultra, Johnson& Johnson, SP, Brazil). Mice were then deeply anesthetized with ketamine 100.0  
99 mg/kg (Francotar<sup>®</sup>, Virbac, Brazil) and xylazine 10.0 mg/kg ip (Virbaxyl 2%<sup>®</sup>, Virbac, Brazil), and  
100 the heart was exposed for blood collection (right atrium). Blood was allowed to clot, centrifuged  
101 (1,500 x g) and the serum was stored at  $-80^{\circ}\text{C}$  for total cholesterol, HDL and triglyceride (TG)  
102 colorimetric assay (cat#K083, #K071 and K117 respectively, Bioclin, Quibasa, Belo Horizonte,  
103 Minas Gerais, BR) and insulin Elisa assay (cat#EZRMI-13K, Merck Millipore, Billerica, MA,  
104 EUA) according to manufacturer's instructions. Insulin resistance was evaluated by the homeostatic  
105 model assessment, where  $\text{HOMA-IR} = [\text{insulin} (\mu\text{U/mL}) \times \text{glucose} (\text{mmol/L})] / 22.5$  (Matthews, et

106 al. 1985) and hepatic TG content was determined as described elsewhere (Gonçalves, et al. 2017).  
107 TyG index, the product of fasting plasma glucose (FPG) and TG was used to further assess insulin  
108 resistance and liver steatosis (Simental-Mendía, Rodríguez-Morán, and Guerrero-Romero 2008;  
109 Simental-Mendía, et al. 2016). It was calculated as  $\ln[\text{FPG (mg/dL)} \times \text{TG (mg/dL)} / 2]$  (Simental-  
110 Mendía, Rodríguez-Morán, and Guerrero-Romero 2008).

### 111 *Fat harvesting*

112 Interscapular brown fat and white visceral (perigonadal and retroperitoneal) and subcutaneous  
113 (inguinal) fat pads were carefully dissected from both sides of the animal, weighed and then  
114 immersed in 4% phosphate buffered formalin pH 7.2 for 48 h. Samples of both contralateral fat  
115 pads were submitted to routine histological processing, embedded in paraplast, sectioned 3  $\mu\text{m}$  thick  
116 and stained with hematoxylin and eosin. To calculate fat distribution, WAT was considered as  $\sum$   
117 (perigonadal (mg) + retroperitoneal (mg) + inguinal (mg)), visceral WAT as  $\sum$  (perigonadal (mg) +  
118 retroperitoneal (mg)) and the inguinal depot as subcutaneous WAT.

### 119 *Adipocyte morphometry*

120 Digital images were obtained from histological sections using a Leica DMRBE microscope  
121 (Wetzlar, German) coupled to a video camera Kappa (Gleichen, German). Morphometry was  
122 performed in the Image-Pro® Plus software v. 5.0 (Media Cybernetics, Silver Spring, MD, USA).  
123 In the interscapular BAT, eight nonconsecutive images were acquired to assess brown adipocyte  
124 diameter, lipid droplet (LD) diameter, and the percentage of tissue area occupied by LD. For lipid  
125 area, a selection tool was used to mark the pixels that represented lipid droplets. The selection was  
126 segmented in a new digital image in black and white, where the white color represented the LD, and  
127 the black color represented the remaining tissue. Then, the area occupied by the white color was  
128 quantified through the image histogram tool. In the three WAT depots studied, we assessed  
129 adipocyte diameter by measuring their smallest and largest diameters, as previously described

130 (Fernandes-Santos, et al. 2009). In this case, we used six animals per group, four nonconsecutive  
131 images per animal, and randomly measured 10 adipocytes per image, totalizing 40 adipocytes per  
132 mice.

### 133 *Statistics*

134 Data are expressed as mean  $\pm$  SEM and tests to assess normality and homoscedasticity of variances  
135 were run. Comparison among groups was made by ANOVA one-way followed by a post-hoc test of  
136 Tukey. A *P*-value of 0.05 was considered statistically significant (GraphPad® Prism software v.  
137 6.0, La Jolla, CA, USA).

## 138 **Results**

### 139 *Early signs of fructose overfeeding: Body fat redistribution without body weight gain*

140 Despite glucose and fructose diets were isoenergetic compared to the control diet, Table 1 shows  
141 that cumulative food intake (FI) in fructose group was 10% lower than the control group ( $P<0.02$ ).  
142 Additionally, energy efficiency reduced by 63% and 87%, respectively, in glucose and fructose  
143 groups ( $P<0.0001$ ). Neither glucose nor fructose feeding changed body weight, and surprisingly  
144 BW gain during the 4 weeks on experimental diets was slowed down, since  $\Delta$  BW was 63% and  
145 88% lower in glucose and fructose groups, respectively, compared to control group ( $P<0.0001$ ). All  
146 white fat depots studied did not vary in weight and did not present adipocyte hypertrophy after  
147 glucose or fructose feeding. However, fructose feeding changed body fat distribution, since the ratio  
148 between visceral and subcutaneous white fat increased, compared to control group (+15%,  
149  $P=0.016$ ).

### 150 *Short-term fructose feeding had limited impact on glucose, lipid and hepatic metabolism*

151 Thirty days of glucose or fructose feeding did not modulate glucose and lipid metabolism to a great  
152 extent, as shown in Table 3. Glucose group presented a decrease of 41% on blood glucose

153 ( $P=0.0002$ ) that was followed by an increase in serum (+80%,  $P<0.0001$ ) and liver (+79%,  
154  $P=0.0002$ ) triglyceride. On the other hand, fructose only affected total cholesterol (+32%,  
155  $P=0.002$ ). Insulin resistance, assessed by HOMA-IR and TyG index, was not developed after 4  
156 weeks of glucose or fructose feeding. Although fructose feeding increased liver weight, TyG index  
157 did not point to the presence of hepatic steatosis (Table 3), and we also did not find  
158 histopathological changes compatible with steatosis (data not shown).

### 159 *Early changes in BAT morphology due to short-term fructose feeding*

160 Figure 1 shows that BAT weight remained unchanged after 4 weeks of glucose or fructose feeding.  
161 The proportion between BAT and WAT was also not changed, despite a subtle decrease in fructose  
162 group. When the amount of visceral WAT is compared to BAT mass, there is a significant decrease  
163 of 18% in fructose group compared to control group ( $P=0.03$ ). Figure 2 depicts BAT morphological  
164 remodeling. Thirty days of glucose or fructose feeding did not change brown adipocyte size (Fig  
165 2A), but intracellular lipid deposition is already noticed by glucose and fructose overfeeding (Fig  
166 2B). The percentage of BAT area occupied by LD increased 19% ( $P=0.01$ ) in glucose group and  
167 17% ( $P=0.02$ ) in fructose group. In fructose group, this increase can be attributed to LD  
168 hypertrophy, since average LD diameter increased 17% ( $P=0.006$ ) compared to control group (Fig  
169 2C). BAT photomicrographs in Fig 2 D-I show that lipid droplets have a uniform size and are  
170 evenly distributed in control mice (D, G). Although glucose group did not present lipid droplet  
171 hypertrophy (Fig 2B), some large droplets are noticed in Fig 2H. Finally, fructose feeding lead to  
172 lipid droplet hypertrophy as seem in Fig 2E-F.

### 173 **Discussion**

174 We demonstrated in male C57BL/6 mice that short-term fructose feeding did not promote weight  
175 gain and adiposity, but WAT fat was redistributed toward visceral depots. Glucose, lipid and  
176 hepatic metabolic dysfunction were not yet noticed, with the exception of increased serum total



177 cholesterol and liver weight. The most prominent finding is that fructose feeding changes the  
178 proportion between BAT and visceral WAT mass, where the second predominates, and BAT suffers  
179 an important premature morphological remodeling due to increased lipid deposition in enlarged  
180 intracellular LD, which precedes the onset cardiometabolic abnormalities.

181 In the present study, fructose diminished cumulative food intake, and it likely led to an absence of  
182 body weight gain. Tillman et al showed that even when cumulative food intake is increased, no  
183 significant increment in final body weight is seen after 14 weeks of 60% fructose feeding (Tillman,  
184 et al. 2014). They also showed that metabolic rate is increased in the second and ninth weeks of  
185 fructose feeding, but at the fourteenth week metabolic rate is similar to control group. We showed  
186 through energy efficiency that fructose group gained less weight per energy consumed, compared to  
187 control group, and based on Tillman's work we suppose that fructose might have also increased  
188 metabolic rate thus maintaining body weight stable.

189 After short-term fructose feeding (4 weeks), C57BL/6 mice still presented neither increased  
190 adiposity nor adipocyte hypertrophy, although early signs of fat redistribution were found toward an  
191 increased visceral WAT. Long-term fructose feeding is supposed to stimulate adiposity, and  
192 Montgomery et al showed increased fat mass on visceral (perigonadal and retroperitoneal) and  
193 subcutaneous (inguinal) WAT depots after 8 weeks of fructose feeding (Montgomery, et al. 2015).  
194 Visceral and subcutaneous WAT have distinct functions, and traditionally visceral WAT has been  
195 associated with metabolic and cardiovascular disease risk (Wajchenberg, et al. 2002). For instance,  
196 visceral obesity can contribute to insulin resistance and coronary artery disease development in  
197 nonobese individuals (Filho, et al. 2006). However, Moreno-Indias et al showed in normal-weight  
198 subjects that macrophage-associated genes are upregulated in subcutaneous but not visceral WAT  
199 (Moreno-Indias, et al. 2016). It suggests that macrophages within subcutaneous fat may also  
200 contribute to the unhealthy phenotype seen in MONW individuals.

201 There is substantial evidence that dietary intake of high amount of fructose leads to the  
202 development of glucose intolerance, insulin resistance, and hepatic steatosis as reviewed elsewhere  
203 (Samuel 2011). Hypercholesterolemia was the only metabolic abnormality found by us after short-  
204 term fructose feeding (4 weeks). We believe that the time of fructose feeding required to develop  
205 further metabolic abnormalities such as insulin resistance needs to be longer than 4 weeks.  
206 Montgomery et al showed that long-term fructose feeding (8 weeks) did not change fasting glucose  
207 and insulin, but it promotes glucose intolerance and decreases plasma TG and non-esterified fatty  
208 acids (NEFA) in mice (Montgomery, et al. 2015). Tillman et al showed that glucose, triglycerides,  
209 and NEFA were not altered in C57BL/6 mice after 14 weeks of fructose feeding (Tillman, et al.  
210 2014). Fructose stimulates gluconeogenesis, but it seems to produce only mild changes in blood  
211 glucose (Dirlewanger, et al. 2000). Although fructose does not increase insulin levels acutely  
212 because it does not induce pancreatic beta cell secretion of insulin like glucose, chronic exposure to  
213 fructose leads to hyperinsulinemia (Basciano, Federico, and Adeli 2005).

214 Insulin resistance includes impairment of fatty acid oxidation and utilization (Kelley and  
215 Goodpaster 2001), and hepatic TG content is a strong determinant of hepatic insulin resistance  
216 (Marchesini, et al. 1999). In the present study, short-term fructose intake increased liver weight  
217 despite no signs of hepatic steatosis, as pointed by TG content, TyG index and histopathological  
218 analysis (data not shown). Long-term studies have shown that fructose feeding promotes hepatic  
219 lipid accumulation of TG and DAG, but not ceramides (Montgomery, et al. 2015). The phenomenon  
220 is due to the upregulation of lipogenic pathways through the elevation of protein contents of both  
221 acetyl-CoA carboxylase isoforms (ACC1 and ACC2), fatty acid synthase (FAS) and stearoyl-CoA  
222 desaturase (SCD1) (Montgomery, et al. 2015).

223 Short-term fructose feeding did not change BAT mass, a result found by us and others  
224 (Montgomery, et al. 2015). We have previously shown in female C57BL/6 mice that BAT mass  
225 gain is a late event in BAT dysfunction during aging (Gonçalves, et al. 2017). We also showed in

226 the present study that average LD size was increased by fructose, but cell size was not affected. We  
227 suppose that long-term fructose feeding would result in brown adipocyte hypertrophy, as well as  
228 white adipocyte hypertrophy. In aged male C57BL/6 mice, brown adipocyte hypertrophy is  
229 associated with BAT morphological abnormalities, lower thermogenesis, and glucose intolerance  
230 (Sellayah and Sikder 2014). LD hypertrophy is due to increased TG storage and, in humans, the TG  
231 content of thermogenic supraclavicular fat deposits may be an independent marker of whole-body  
232 insulin sensitivity, independent of BAT metabolic activation (Raiko, et al. 2015). In summary, these  
233 data show early modifications of BAT adipocyte architecture by fructose, that will likely lead to  
234 metabolic dysfunction in the future, but additional studies are necessary to confirm this hypothesis.

235 LD size regulation and lipid storage capacity are important to maintain normal biological functions,  
236 and its dysregulation results in the development of metabolic diseases such as obesity, diabetes,  
237 fatty liver and cardiovascular diseases. The nutritional response, hormones and environmental  
238 factors may also contribute to increased LD size and lipid storage (Beller, et al. 2010). LD growth  
239 occurs by the fusion of pre-existing LDs, lipid biosynthesis in situ or by lipid transfer from adjacent  
240 organelles, including endoplasmic reticulum. Although white and brown adipocytes accumulate  
241 large amounts of fat, LDs differ in size, number and protein content (Anand, et al. 2012). Brown  
242 adipocytes are filled with many relatively small sized LDs (multilocular) that are closely associated  
243 with mitochondria. This arrangement facilitates the accessibility of lipases to LD surface for the  
244 rapid release of fatty acids. LD biosynthesis and expansion are driven by complex and integrated  
245 mechanisms involving interactions with other organelles and enzymes for the expansion of the lipid  
246 core and the modulation of phospholipids monolayer composition (Barbosa, Savage, and  
247 Siniossoglou 2015).

248 The MONW phenotype is characterized by normal weight with increased adiposity and to  
249 investigate its underlying mechanisms is of ultimate importance. So far, MONW study in mouse  
250 models is limited, and fructose feeding is a potential model to investigate the mechanisms

251 underlying the MONW phenotype. In C57BL/6 mice, it seems that fructose in the drinking water *ad*  
252 *libitum* can elicit an obesogenic response, but not fructose offered in the food. This very different  
253 response in mice to either fed fructose or given fructose liquid was not explored so far. Thus,  
254 further studies are necessary to determine the best route for fructose administration (chow or drink  
255 water). It is also necessary to investigate how long it takes to develop the MONW phenotype by  
256 fructose. Finally, it is important to know which cardiometabolic abnormalities commonly found in  
257 MONW humans fructose feed mice would develop (for instance, glucose intolerance, insulin  
258 resistance, low-grade inflammation, hypertriglyceridemia, and hypertension), and the time required  
259 to see these cardiometabolic changes.

## 260 **Conclusion**

261 Short-term fructose feeding redistributes body fat, changes the proportion of BAT to visceral fat,  
262 and promotes BAT adverse remodeling. The novelty of the present work is that BAT displays early  
263 morphological signs of future metabolic dysfunction before cardiometabolic dysfunction itself, in a  
264 model of fructose-fed normal weight mice. A future direction is to determine the timing of  
265 cardiometabolic disturbance onset due to fructose overfeeding and BAT adverse remodeling in  
266 long-term fructose feeding in male and female C57BL/6 mice.

## 267 **Acknowledgements**

268 Authors are thankful for Dilliane da Paixão Rodrigues Almeida for her technical assistance.

## 269 **Conflicts of interest**

270 There are no conflicts of interest to declare.

## 271 **Funding source**

272 This work was supported by the Foundation for Research Support of the State of Rio de Janeiro  
273 (FAPERJ, grant number E-26/210.525/2014) and by the Fluminense Federal University Pro-Rector  
274 of Research, Post-Graduate Studies and Innovation (PROPPI/UFF).

## 275 References

- 276 Anand, P., et al. 2012. "A Novel Role for Lipid Droplets in the Organismal Antibacterial  
277 Response." *Elife* 1 (Nov 13): e00003. <http://dx.doi.org/10.7554/eLife.00003>.  
278
- 279 Barbosa, A. D., D. B. Savage, and S. Siniouoglou. 2015. "Lipid Droplet-Organelle Interactions:  
280 Emerging Roles in Lipid Metabolism." *Curr Opin Cell Biol* 35 (Aug): 91-7.  
281 <http://dx.doi.org/10.1016/j.ceb.2015.04.017>.  
282
- 283 Bartelt, A., et al. 2011. "Brown Adipose Tissue Activity Controls Triglyceride Clearance." *Nat Med*  
284 17, no. 2 (Feb): 200-5. <http://dx.doi.org/10.1038/nm.2297>.  
285
- 286 Basciano, H., L. Federico, and K. Adeli. 2005. "Fructose, Insulin Resistance, and Metabolic  
287 Dyslipidemia." *Nutr Metab (Lond)* 2, no. 1 (Feb): 5. <http://dx.doi.org/1743-7075-2-5> [pii]  
288 10.1186/1743-7075-2-5.  
289
- 290 Beller, M., et al. 2010. "Lipid Droplets: A Dynamic Organelle Moves into Focus." *FEBS Lett* 584,  
291 no. 11 (Jun 03): 2176-82. <http://dx.doi.org/10.1016/j.febslet.2010.03.022>.  
292
- 293 Denis, G. V., and M. S. Obin. 2013. "'Metabolically Healthy Obesity': Origins and Implications."  
294 *Mol Aspects Med* 34, no. 1 (Feb): 59-70. <http://dx.doi.org/10.1016/j.mam.2012.10.004>.  
295
- 296 Dirlewanger, M., et al. 2000. "Effects of Fructose on Hepatic Glucose Metabolism in Humans." *Am*  
297 *J Physiol Endocrinol Metab* 279, no. 4 (Oct): E907-11.  
298 <https://doi.org/10.1152/ajpendo.2000.279.4.E907>  
299
- 300 Fernandes-Santos, C., et al. 2009. "Pan-Ppar Agonist Beneficial Effects in Overweight Mice Fed a  
301 High-Fat High-Sucrose Diet." *Nutrition* 25, no. 7-8 (2009 Jul-Aug): 818-27.  
302 <http://dx.doi.org/10.1016/j.nut.2008.12.010>.  
303
- 304 Filho, F. F. R., et al. 2006. "Visceral Fat and Metabolic Syndrome: More Than a Simple  
305 Association." *Arq Bras Endocrinol Metab* 50, no. 2 (04/2006): 230-238.  
306 <http://dx.doi.org/10.1590/S0004-27302006000200009>.  
307
- 308 Gonçalves, L. F., et al. 2017. "Ageing Is Associated with Brown Adipose Tissue Remodelling and  
309 Loss of White Fat Browning in Female C57bl/6 Mice." *Int J Exp Pathol* 98, no. 2 (Apr):  
310 100-108. <http://dx.doi.org/10.1111/iep.12228>.  
311
- 312 Ipsen, D. H., P. Tveden-Nyborg, and J. Lykkesfeldt. 2016. "Dyslipidemia: Obese or Not Obese-  
313 That Is Not the Question." *Curr Obes Rep* 5, no. 4 (Dec): 405-412.  
314 <http://dx.doi.org/10.1007/s13679-016-0232-9>.  
315

- 316 Kelley, D. E., and B. H. Goodpaster. 2001. "Skeletal Muscle Triglyceride. An Aspect of Regional  
317 Adiposity and Insulin Resistance." *Diabetes Care* 24, no. 5 (May): 933-41.  
318 <https://doi.org/10.2337/diacare.24.5.933>  
319
- 320 Kilkenny, C., et al. 2010. "Improving Bioscience Research Reporting: The Arrive Guidelines for  
321 Reporting Animal Research." *PLoS Biol* 8, no. 6: e1000412.  
322 <http://dx.doi.org/10.1371/journal.pbio.1000412>.  
323
- 324 Maffetone, P. B., I. Rivera-Dominguez, and P. B. Laursen. 2017. "Overfat Adults and Children in  
325 Developed Countries: The Public Health Importance of Identifying Excess Body Fat."  
326 *Front. Public Health* 5: 190. <http://dx.doi.org/doi:10.3389/fpubh.2017.00190>.  
327
- 328 Marchesini, G., et al. 1999. "Association of Nonalcoholic Fatty Liver Disease with Insulin  
329 Resistance." *Am J Med* 107, no. 5 (Nov): 450-5. [https://doi.org/10.1016/S0002-  
330 9343\(99\)00271-5](https://doi.org/10.1016/S0002-9343(99)00271-5).  
331
- 332 Matthews, D. R., et al. 1985. "Homeostasis Model Assessment: Insulin Resistance and Beta-Cell  
333 Function from Fasting Plasma Glucose and Insulin Concentrations in Man." *Diabetologia*  
334 28, no. 7 (Jul): 412-9. <https://link.springer.com/article/10.1007/BF00280883>.  
335
- 336 Montgomery, M. K., et al. 2015. "Disparate Metabolic Response to Fructose Feeding between  
337 Different Mouse Strains." *Sci Rep* 5 (Dec 22): 18474. <http://dx.doi.org/10.1038/srep18474>.  
338
- 339 Moreno-Indias, I., et al. 2016. "Adipose Tissue Infiltration in Normal-Weight Subjects and Its  
340 Impact on Metabolic Function." *Transl Res* 172 (Jun): 6-17.e3.  
341 <http://dx.doi.org/10.1016/j.trsl.2016.01.002>.  
342
- 343 "Obesity: Preventing and Managing the Global Epidemic. Report of a Who Consultation." 2000.  
344 *World Health Organ Tech Rep Ser* 894: i-xii, 1-253.  
345 [http://www.who.int/nutrition/publications/obesity/WHO\\_TRS\\_894/en/](http://www.who.int/nutrition/publications/obesity/WHO_TRS_894/en/).  
346
- 347 Pagadala, M. R., and A. J. McCullough. 2012. "Non-Alcoholic Fatty Liver Disease and Obesity:  
348 Not All About Body Mass Index." In *Am J Gastroenterol*, vol 107, 1859-61. United States.  
349 <https://doi.org/10.1038/ajg.2012.320>  
350
- 351 R., Ricci M., and Pellizon M. A. 2017. "Effect of High Fructose/Sucrose Diets on Plasma Lipid  
352 Levels and Insulin Resistance in Rodents." Last modified 2017 08 04.  
353 [http://www.researchdiets.com/opensource-diets/diet-induced-disease-models/diabetes-  
354 insulin-resistance](http://www.researchdiets.com/opensource-diets/diet-induced-disease-models/diabetes-insulin-resistance).  
355
- 356 Raiko, J., et al. 2015. "Brown Adipose Tissue Triglyceride Content Is Associated with Decreased  
357 Insulin Sensitivity, Independently of Age and Obesity." *Diabetes Obes Metab* 17, no. 5  
358 (May): 516-9. <http://dx.doi.org/10.1111/dom.12433>.  
359
- 360 Reeves, P. G., F. H. Nielsen, and G. C. Fahey, Jr. 1993. "Ain-93 Purified Diets for Laboratory  
361 Rodents: Final Report of the American Institute of Nutrition Ad Hoc Writing Committee on  
362 the Reformulation of the Ain-76a Rodent Diet." *J Nutr* 123, no. 11 (Nov): 1939-51.  
363 <https://doi.org/10.1093/jn/123.11.1939>.  
364
- 365 Ruderman, N., et al. 1998. "The Metabolically Obese, Normal-Weight Individual Revisited."  
366 *Diabetes* 47, no. 5 (May): 699-713. <https://doi.org/10.2337/diabetes.47.5.699>.  
367

- 368 Samuel, V. T. 2011. "Fructose Induced Lipogenesis: From Sugar to Fat to Insulin Resistance."  
369 *Trends Endocrinol Metab* 22, no. 2 (Feb): 60-5.  
370 <http://dx.doi.org/10.1016/j.tem.2010.10.003>.  
371
- 372 Scheja, L., and J. Heeren. 2016. "Metabolic Interplay between White, Beige, Brown Adipocytes and  
373 the Liver." *J Hepatol* (Jan 29). <http://dx.doi.org/10.1016/j.jhep.2016.01.025>.  
374
- 375 Sellayah, D., and D. Sikder. 2014. "Orexin Restores Aging-Related Brown Adipose Tissue  
376 Dysfunction in Male Mice." *Endocrinology* 155, no. 2 (Feb): 485-501.  
377 <http://dx.doi.org/10.1210/en.2013-1629>.  
378
- 379 Simental-Mendía, L. E., M. Rodríguez-Morán, and F. Guerrero-Romero. 2008. "The Product of  
380 Fasting Glucose and Triglycerides as Surrogate for Identifying Insulin Resistance in  
381 Apparently Healthy Subjects." *Metab Syndr Relat Disord* 6, no. 4 (Dec): 299-304.  
382 <http://dx.doi.org/10.1089/met.2008.0034>.  
383
- 384 Simental-Mendía, L. E., et al. 2016. "The Product of Triglycerides and Glucose as Biomarker for  
385 Screening Simple Steatosis and Nash in Asymptomatic Women." *Ann Hepatol* 15, no. 5  
386 (2016 Sep-Oct): 715-20. <http://dx.doi.org/10.5604/16652681.1212431>.  
387
- 388 Tillman, E. J., et al. 2014. "Three Months of High-Fructose Feeding Fails to Induce Excessive  
389 Weight Gain or Leptin Resistance in Mice." *PLoS One* 9, no. 9: e107206.  
390 <http://dx.doi.org/10.1371/journal.pone.0107206>.  
391
- 392 Wajchenberg, B. L., et al. 2002. "Depot-Specific Hormonal Characteristics of Subcutaneous and  
393 Visceral Adipose Tissue and Their Relation to the Metabolic Syndrome." *Horm Metab Res*  
394 34, no. 11-12 (Nov-Dec): 616-21. <http://dx.doi.org/10.1055/s-2002-38256>.

395 **Table 1 – Diets composition**

396

| Ingredients (g/Kg)       | Diets    |          |          |
|--------------------------|----------|----------|----------|
|                          | Control  | Glucose  | Fructose |
| Casein                   | 140.0    | 140.0    | 140.0    |
| Cornstarch               | 620.7    | 220.7    | 220.7    |
| Sucrose                  | 100.0    | -        | -        |
| Fructose                 | -        | -        | 500.0    |
| Glucose                  | -        | 500.0    | -        |
| Fiber                    | 50.0     | 50.0     | 50.0     |
| Soybean oil              | 40.0     | 40.0     | 40.0     |
| Vitamin mix*             | 10.0     | 10.0     | 10.0     |
| Mineral mix*             | 35.0     | 35.0     | 35.0     |
| Choline bitartrate       | 2.5      | 2.5      | 2.5      |
| L-Cystine                | 1.8      | 1.8      | 1.8      |
| Antioxidant <sup>#</sup> | 0.008    | 0.008    | 0.008    |
| Sum, g                   | 1 000.00 | 1 000.00 | 1 000.00 |
| Kcal/g                   | 3.81     | 3.81     | 3.81     |

397

398

399

\* Vitamin and mineral mix composition is based on AIN-93M.

<sup>#</sup> Tert-butylhydroquinone.



400 **Table 2 – Energy intake, body weight and adiposity**

401

| Parameters                  | Groups      |                        |                          |
|-----------------------------|-------------|------------------------|--------------------------|
|                             | Control     | Glucose                | Fructose                 |
| <b>Ingestion</b>            |             |                        |                          |
| Σ FI, g                     | 115.86±1.92 | 116±1.85               | 103.79±2.71 <sup>b</sup> |
| EE, mg/Kcal                 | 5.97±0.88   | 2.20±0.68 <sup>a</sup> | 0.76±0.36 <sup>b</sup>   |
| <b>Body weight</b>          |             |                        |                          |
| Initial, g                  | 30.36±0.46  | 30.99±0.61             | 31.36±0.46               |
| Final, g                    | 32.99±0.29  | 31.96±0.52             | 31.68±0.54               |
| Δ, g                        | 2.63±0.39   | 0.97±0.31 <sup>a</sup> | 0.32±0.15 <sup>b</sup>   |
| <b>WAT</b>                  |             |                        |                          |
| Genital, mg/g of BW         | 12.65±0.82  | 12.05±0.78             | 14.04±0.46               |
| Retroperitoneal, mg/g of BW | 3.78±0.30   | 3.29±0.22              | 4.10±0.32                |
| Inguinal, mg/g of BW        | 11.51±0.68  | 10.88±0.83             | 11.38±0.66               |
| Visc:Subc ratio             | 1.44±0.06   | 1.43±0.06              | 1.65±0.05 <sup>a,b</sup> |
| <b>Adipocyte diameter</b>   |             |                        |                          |
| Genital, μm                 | 59.43±1.69  | 56.43±1.84             | 57.65±0.96               |
| Retroperitoneal, μm         | 54.03±0.73  | 52.99±3.02             | 54.59±1.50               |
| Inguinal, μm                | 42.27±2.51  | 37.79±2.41             | 35.68±1.98               |

402

403 Data are expressed as mean±SEM. When indicated, P<0.05, [a] ≠ Control group and [b] ≠ Glucose  
 404 group (one-way Analysis of variance and Tukey's multiple comparison test). Abbreviations: Σ FI,  
 405 sum of food intake, from day 0 to the 30<sup>th</sup> day; EE, energy efficiency; WAT, white adipose tissue;  
 406 BW, body weight; Visc, visceral fat; Sub, subcutaneous fat. Energy efficiency was calculated based  
 407 on Δ body weight and Σ energy intake.

408 **Table 3 – Glucose, lipid and hepatic metabolism**

409

| Parameters                             | Groups       |                          |                           |
|----------------------------------------|--------------|--------------------------|---------------------------|
|                                        | Control      | Glucose                  | Fructose                  |
| Glucose metabolism                     |              |                          |                           |
| Glucose (day 0), mg/dL                 | 128±7.11     | 116.9±7.04               | 107±4.31                  |
| Glucose (day 30 <sup>th</sup> ), mg/dL | 120.6±8.56   | 68.6±5.45 <sup>*a</sup>  | 111±5.67 <sup>b</sup>     |
| Insulin, ng/mL                         | 0.32±0.01    | 0.29±0.02                | 0.38±0.01                 |
| HOMA-IR                                | 2.66±0.24    | 2.44±0.25                | 2.93±0.18                 |
| Lipid Metabolism                       |              |                          |                           |
| Total Cholesterol, mg/dL               | 92.64±4.34   | 95.61±3.11               | 122.1±5.81 <sup>a,b</sup> |
| HDL, md/dL                             | 47.16±2.04   | 49.11±3.13               | 41.2±4.51                 |
| Triglyceride, mg/dL                    | 71.49±4.18   | 128.7±15.51 <sup>a</sup> | 65.92±3.62 <sup>b</sup>   |
| Hepatic metabolism                     |              |                          |                           |
| Liver, g/g BW                          | 0.042±0.0006 | 0.041±0.0007             | 0.044±0.0006 <sup>a</sup> |
| Triglyceride, mg/dL/mg                 | 2.76±0.34    | 4.95±0.54 <sup>a</sup>   | 2.78±0.20 <sup>b</sup>    |
| TyG index                              | 8.37±0.13    | 8.31±0.07                | 8.11±0.09                 |

410

411

412

413

414

Data are expressed as mean±SEM. When indicated, P<0.05, [a] ≠ control group, [b] ≠ glucose group (one-way Analysis of variance and Tukey's multiple comparison test), and [\*] ≠ glucose group of blood glucose (day 0, paired t Test). Abbreviations: BW, body weight; TyG, product of glucose and triglyceride.

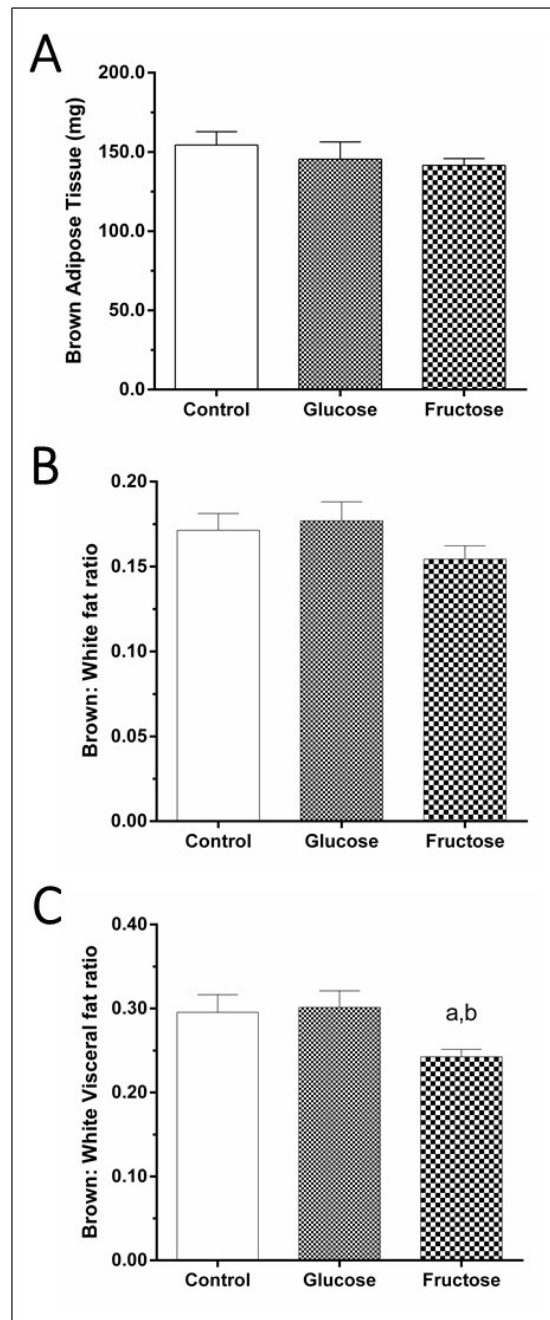

415

416 **Figure 1** – Interscapular brown fat. Glucose or fructose feeding neither change brown adipose

417 tissue (BAT) mass (**A**) nor the ratio between BAT and white adipose tissue (WAT) mass (**B**).

418 However, fructose decreased the ratio between BAT and visceral WAT (**C**). N=6 mice/group, mean

419  $\pm$  SEM, One-way analysis of variance, post-hoc test of Tukey,  $P < 0.05$ , [a] vs. control group and, [b]

420 vs. glucose group.

421

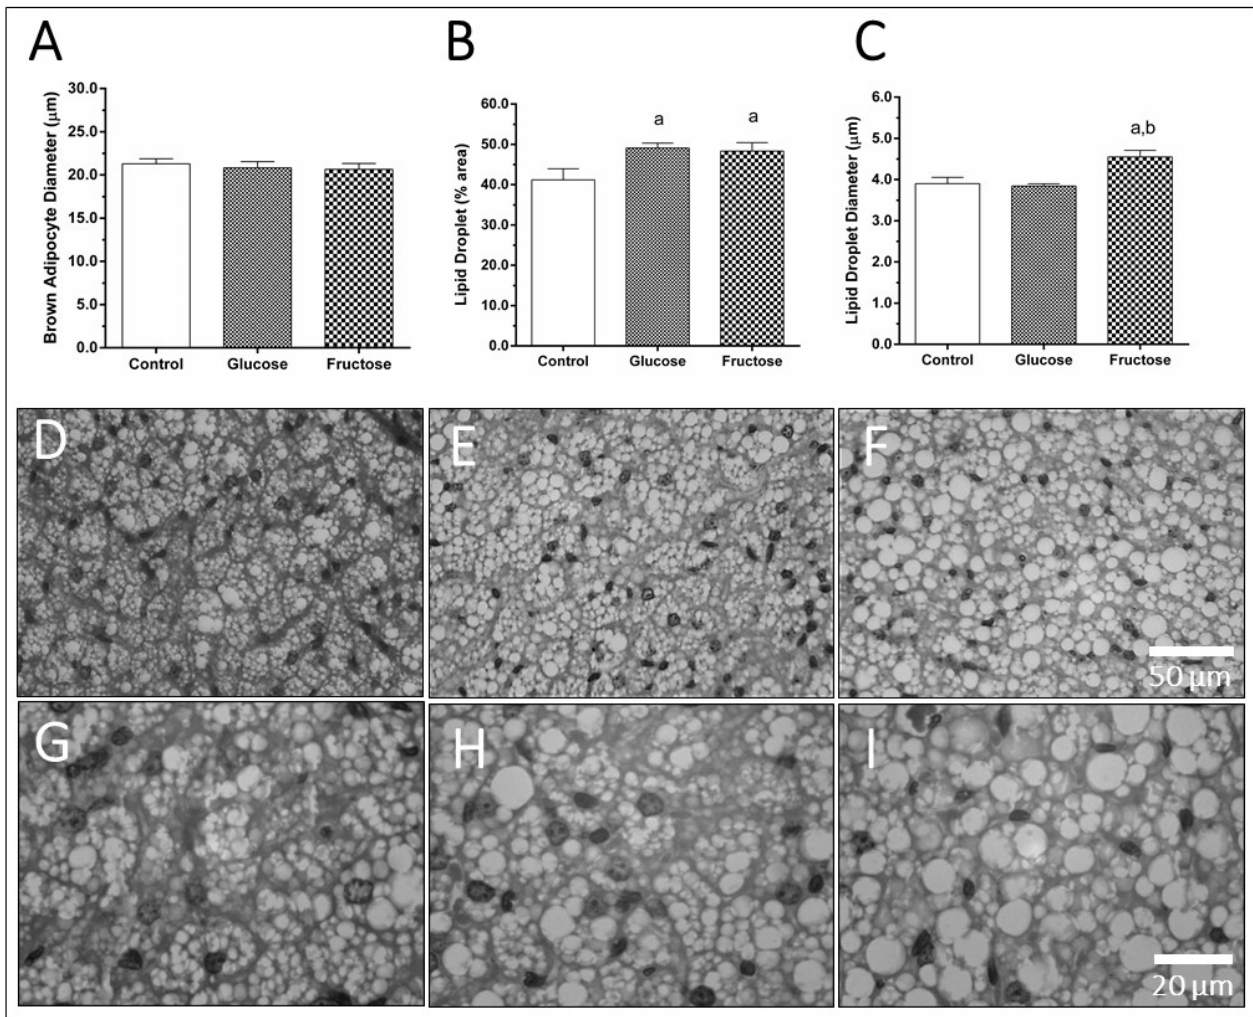

422

423 **Figure 2** – Diet-induced morphological changes in interscapular brown adipose tissue (BAT) of  
424 male C57BL/6 mice. Brown adipocytes size was not altered by glucose or fructose feeding (A), but  
425 both diets increased the percentage of tissue area occupied by cytoplasmic lipid droplets (B). In  
426 fructose-feed mice, the last change was due to an increase in lipid droplet diameter (C). D-I are  
427 photomicrographs (H&E stain) in lower (D, E, F) and higher (G, H, I) magnification illustrating  
428 BAT remodeling. Lipid droplets are uniformly distributed in size along the tissue in control mice  
429 (D, G). Although glucose feeding did not alter average lipid droplet size, some large droplets are  
430 noticed (E, H). On the other hand, lipid droplet hypertrophy is visible in E and F due to fructose  
431 feeding. N=6 mice/group, mean ± SEM, One-way analysis of variance, post-hoc test of Tukey,  
432 P<0.05, [a] vs. control group and, [b] vs. glucose group.
